# Supplementary material for: Defect and carrier characteristics of chalcogenide perovskite BaZrS 3 under thermodynamic stability: a first-principles study for photovoltaic application
Source: Royal Society of Chemistry journal article supplement (doi:10.1039/d5ra07387a), 2026-01-01
Supplement: d5ra07387a1.pdf [file d5ra07387a1.pdf]

## Supplementary information

### Defect and carrier characteristics of chalcogenide perovskite BaZrS<sub>3</sub> under thermodynamically stability: A first-principles study for photovoltaic application

Qinmiao Chen<sup>a,d</sup>, Yi Ni<sup>a</sup> and Yufei Wang<sup>b,c</sup>

<sup>a</sup> School of Physics, East China University of Science and Technology, 130 Meilong Road, Shanghai 200237, China.

<sup>b</sup> Laboratory of Solid State Optoelectronics Information Technology, Institute of Semiconductors, Chinese Academy of Sciences, Beijing 100083, China.

<sup>c</sup> College of Future Technology, University of Chinese Academy of Sciences, Beijing 101408, China

<sup>d</sup> e-mail: [qmchen@ecust.edu.cn](mailto:qmchen@ecust.edu.cn).

*Optical characteristics of BaZrS<sub>3</sub>:*

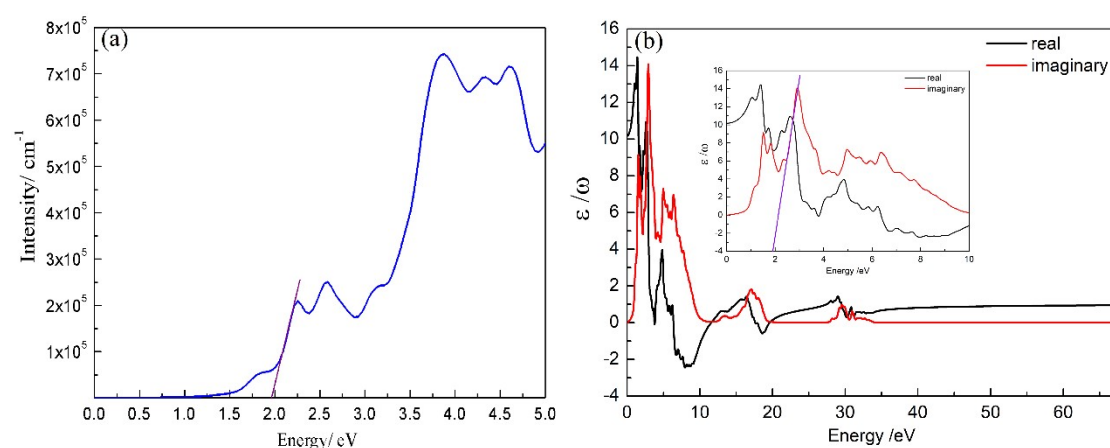

**Figure S1.** Calculated (a) optical absorption and (b) dielectric constant characteristics of BaZrS<sub>3</sub>.

***Influence of element doping on the band and thermodynamically stability of BaZrS<sub>3</sub>:***

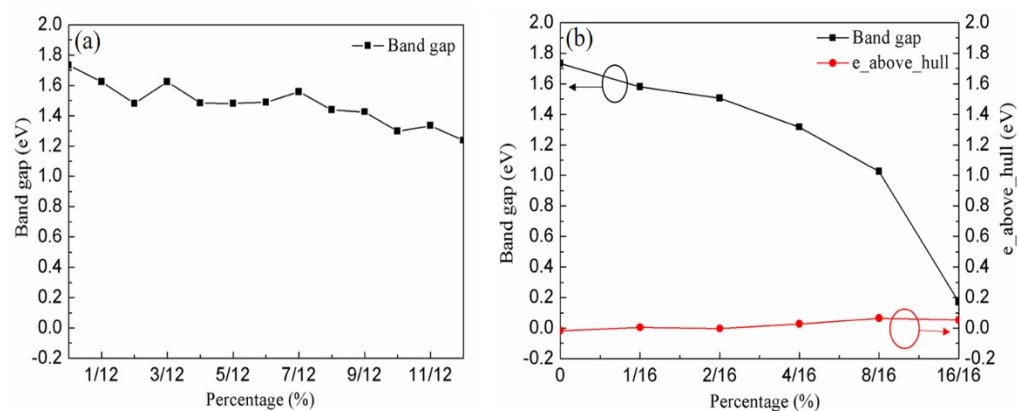

**Figure S2.** (a) The band gap of BaZrS<sub>3</sub> with the varied Se doping; (b) The band gap and e\_above\_hull of BaZrS<sub>3</sub> with the varied Ti doping.

**Formation energy of intrinsic defects in BaZrS<sub>3</sub> as a function of the Fermi energy:**

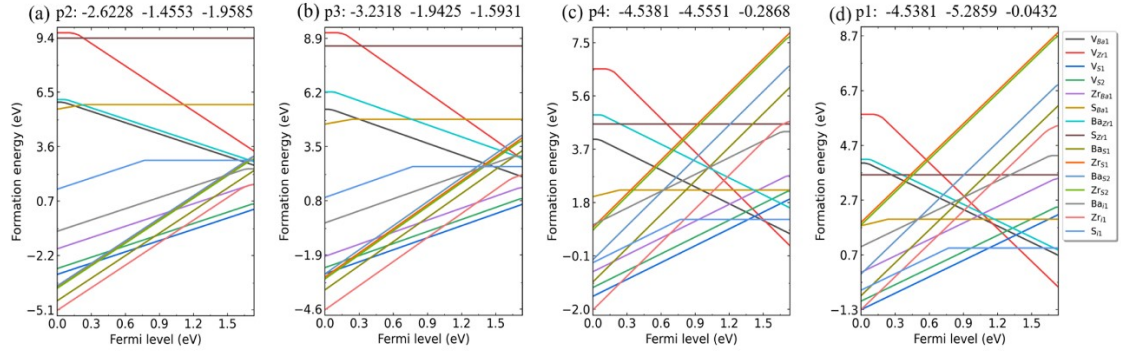

**Figure S3.** The formation energy of intrinsic defects as a function of the Fermi energy in the sequence of p2-p3-p4-p1, as displayed in (a)-(b)-(c)-(d). The defect charge state determines the slope of the line, and the turning points represent the transition energy levels between different charge states for a given defect.

**Photoelectric conversion characteristics of the modeled BaZrS<sub>3</sub> solar cell:**

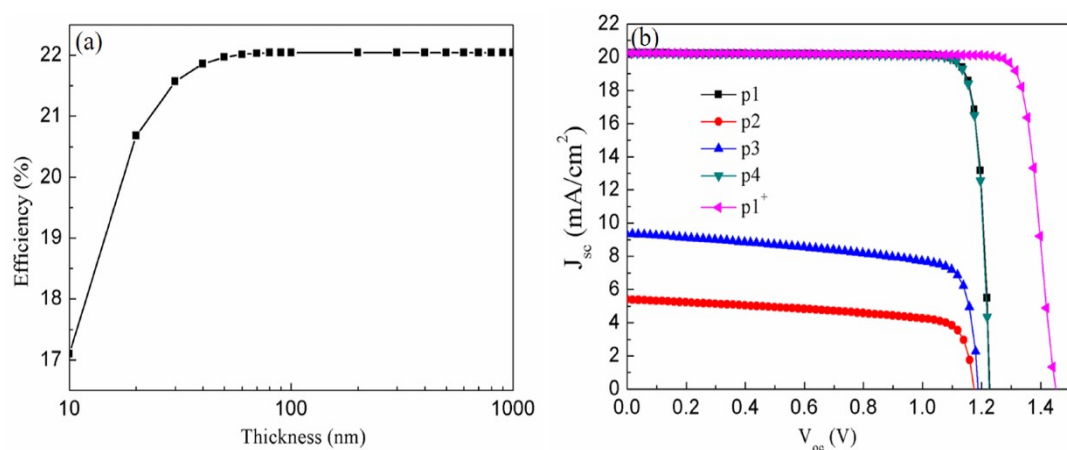

**Figure S4.** The calculated J-V characteristics of BaZrS<sub>3</sub> in the BaZrS<sub>3</sub>-PTAA junction. (a) The effect of thin-film thickness of the BaZrS<sub>3</sub> on its conversion efficiency; (b) the photovoltaic properties of BaZrS<sub>3</sub> at p2, p3, p4, p1 and p1<sup>+</sup>.

**Table S1.** The main photoelectric features of BaZrS<sub>3</sub>.

|                                                                       | p2     | p3    | p4     | p1      | p1 <sup>+</sup> |
|-----------------------------------------------------------------------|--------|-------|--------|---------|-----------------|
| <b>Efficiency</b>                                                     | 4.34 % | 7.96% | 21.96% | 22.04 % | 25.46%          |
| <b>Short-circuit current (<math>J_{sc}</math>, mA/cm<sup>2</sup>)</b> | 5.41   | 9.37  | 20.24  | 20.25   | 20.25           |
| <b>Open circuit voltage (<math>V_{oc}</math>, V)</b>                  | 1.17   | 1.19  | 1.23   | 1.228   | 1.45            |
| <b>Fill factor (FF, %)</b>                                            | 68.40  | 71.43 | 88.46  | 88.61   | 86.73           |
